# Supplementary material for: Metabolic analysis of radioresistant medulloblastoma stem-like clones and potential therapeutic targets
Source: PubMed Central journal article supplement (PMC5398704; doi:10.1371/journal.pone.0176162), 2017-04-20
Supplement: pone.0176162.s001.pdf [file pone.0176162.s001.pdf]

# S1 Fig

## A

In vitro stemness characterization of ONS-76, F8, B11 and F11

|                        | CD133 ratio (%) | Sphere forming cell frequency | Side population ratio (%) | Radioresistance (SF2) |
|------------------------|-----------------|-------------------------------|---------------------------|-----------------------|
| ONS-76 (parental cell) | 3.77            | 1/23.2                        | 0.14                      | 0.64                  |
| ONS-F8                 | 25.30*          | 1/10.8*                       | 0.26*                     | 0.82*                 |
| ONS-B11                | 43.91*          | 1/10.3*                       | 0.33*                     | 0.90*                 |
| ONS-F11                | 14.19*          | 1/13.2*                       | 0.24*                     | 0.81*                 |

Sphere forming cell frequency were calculated by limiting dilution assay. Values of SF2 indicate surviving fractions at dose of 2 Gy.

\*indicated significant differences (vs. ONS-76, Student-t test,  $P < 0.05$ )

These data have been published in JRR. 2013; 54(1)

## B

Tumorigenicity of ONS-76, ONS-F8 and ONS-B11 cells in NOD/SCID mice

|         | Cell Numbers for Injection |                 |                 |                 | Tumorigenic cell frequency (P value, vs. ONS-76) |
|---------|----------------------------|-----------------|-----------------|-----------------|--------------------------------------------------|
|         | $1 \times 10^6$            | $1 \times 10^4$ | $1 \times 10^3$ | $1 \times 10^2$ |                                                  |
| ONS-76  | 6/6                        | 4/6             | 4/6             | 0/6             | 1/4747                                           |
| ONS-F8  | 6/6                        | 5/6             | 5/6             | 5/6             | 1/1351 ( $p < 0.05$ )                            |
| ONS-B11 | 6/6                        | 5/6             | 5/6             | 4/6             | 1/1508 ( $p < 0.05$ )                            |

Note: The cells were injected into the subcutaneous of male NOD/SCID mice.

Tumor formation was observed for 16 weeks after injection.

Tumorigenic cell frequency were calculated by the formula available on the WEHI ELDA website (<http://bioinf.wehi.edu.au/software/elda/>).

### S1 Fig. Establishment of radioresistant medulloblastoma stem cell-like clones.

(A) Summary of cancer stem cell-like cell phenotypes in vitro (reprinted from our previous report). (B) Tumorigenicity of ONS-76, -F8, and -B11 cells in NOD/SCID mice. Cells were injected subcutaneously into male NOD/SCID mice and tumor formation was observed for 16 weeks after injection. Tumorigenic cell frequencies were calculated using the formula available on the WEHI ELDA website.
