# Supplementary material for: Metabolic analysis of radioresistant medulloblastoma stem-like clones and potential therapeutic targets
Source: PubMed Central journal article supplement (PMC5398704; doi:10.1371/journal.pone.0176162), 2017-04-20
Supplement: pone.0176162.s002.pdf [file pone.0176162.s002.pdf]

## S2 Fig

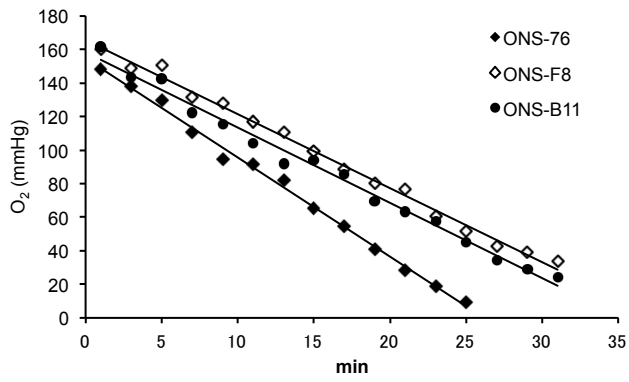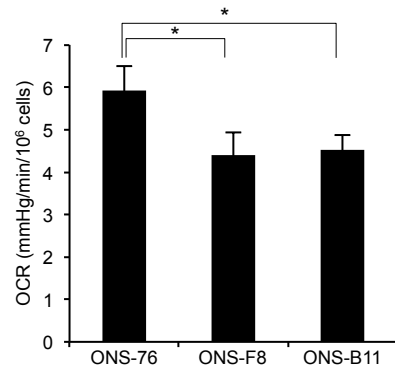

**S2 Fig. Diminution of OCR in ONS-F8 and -B11 cells.** OCR (using ESR oximetry) in ONS-76, -F8 and -B11 cells. All quantitative data are means  $\pm$  S.D. \* $P < 0.05$ , Welch's t-test.
