# Supplementary material for: Metabolic analysis of radioresistant medulloblastoma stem-like clones and potential therapeutic targets
Source: PubMed Central journal article supplement (PMC5398704; doi:10.1371/journal.pone.0176162), 2017-04-20
Supplement: pone.0176162.s004.pdf [file pone.0176162.s004.pdf]

# S4 Fig A

Glucose

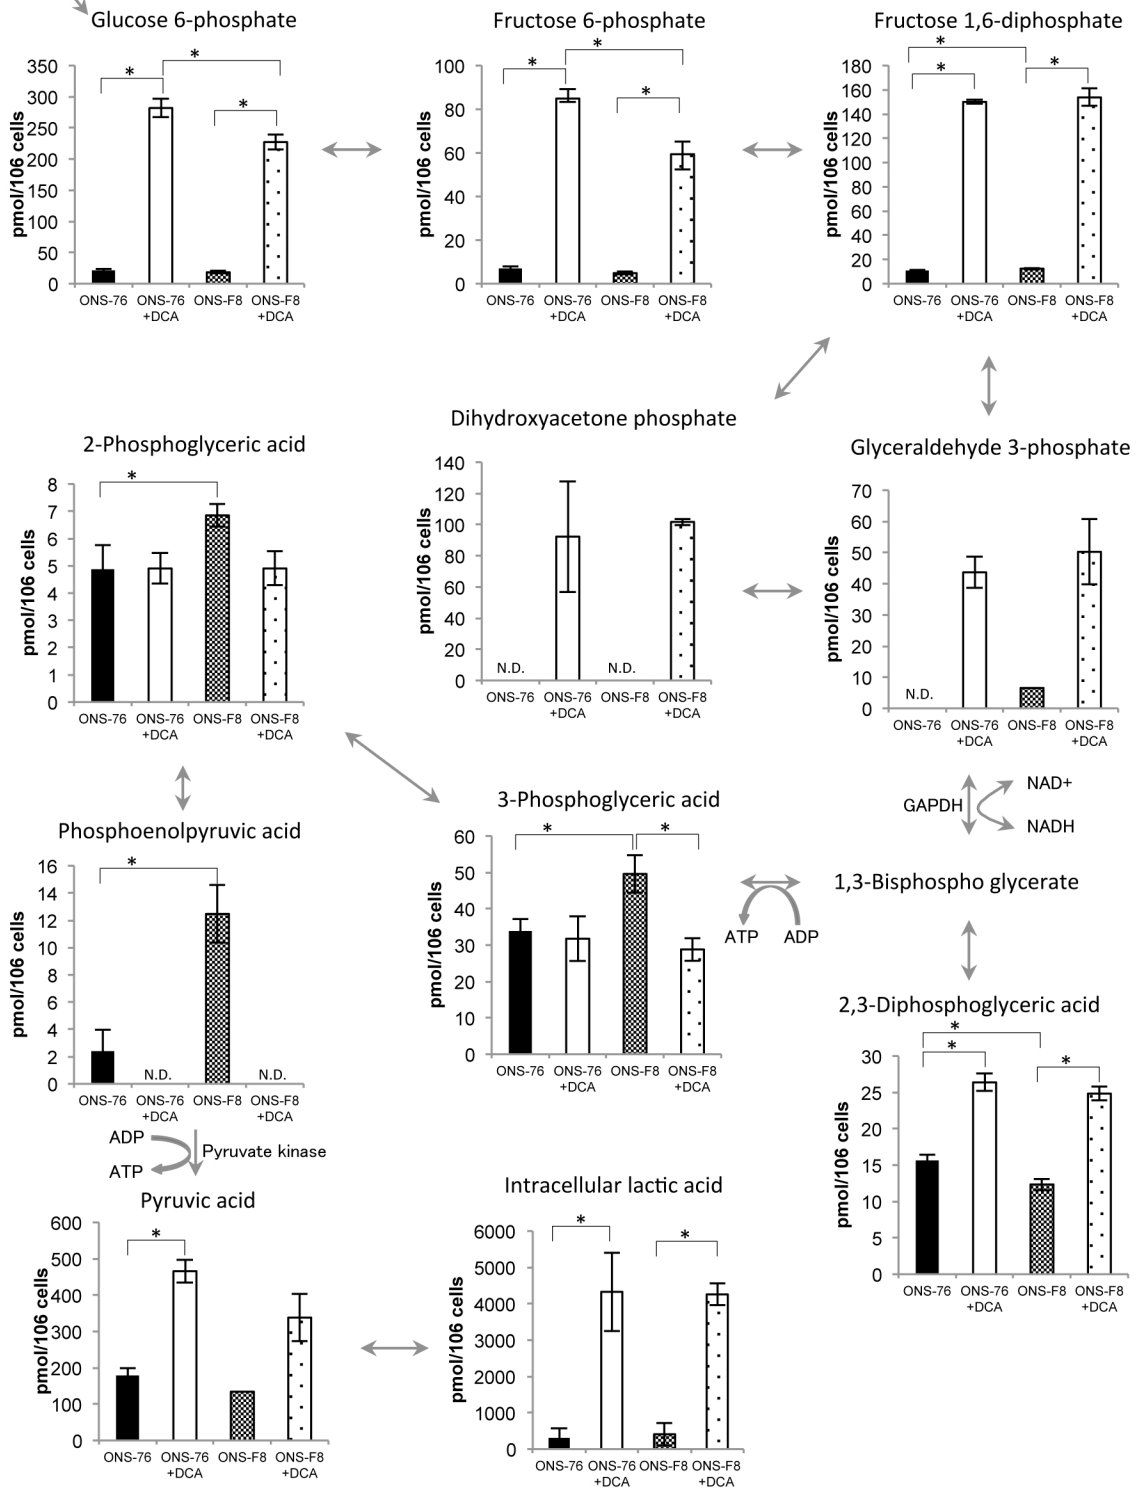

# S4 Fig B

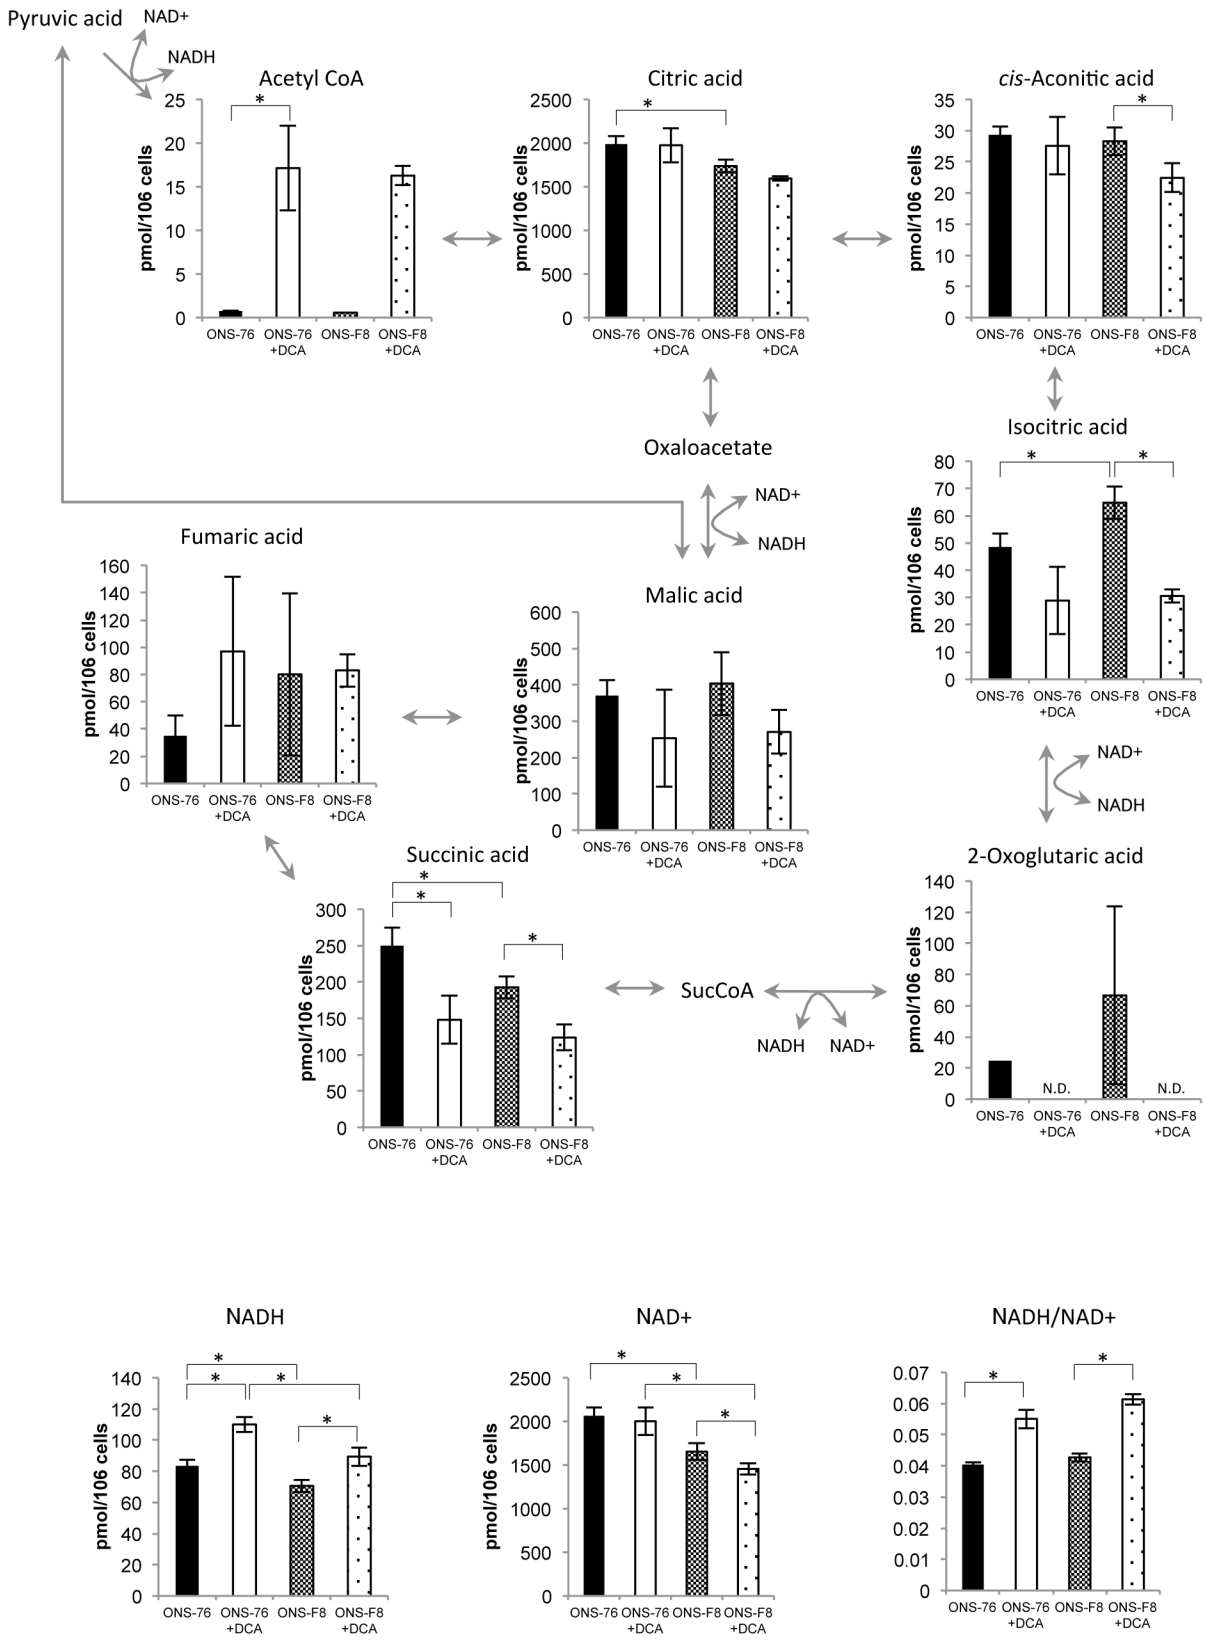

# S4 Fig C

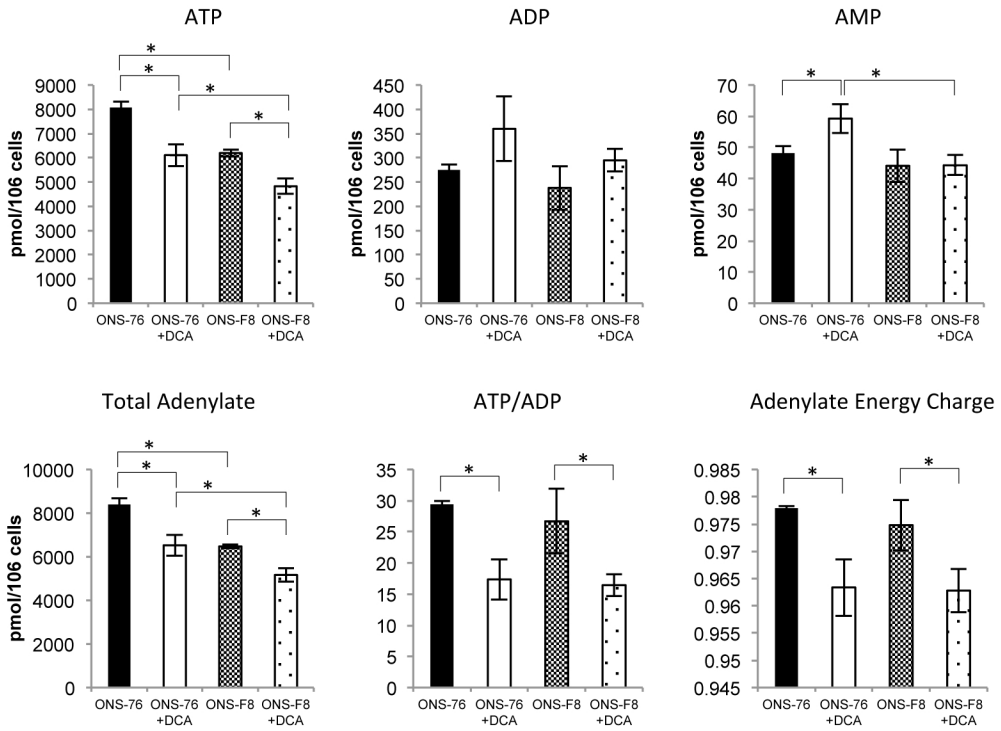

# S4 Fig D

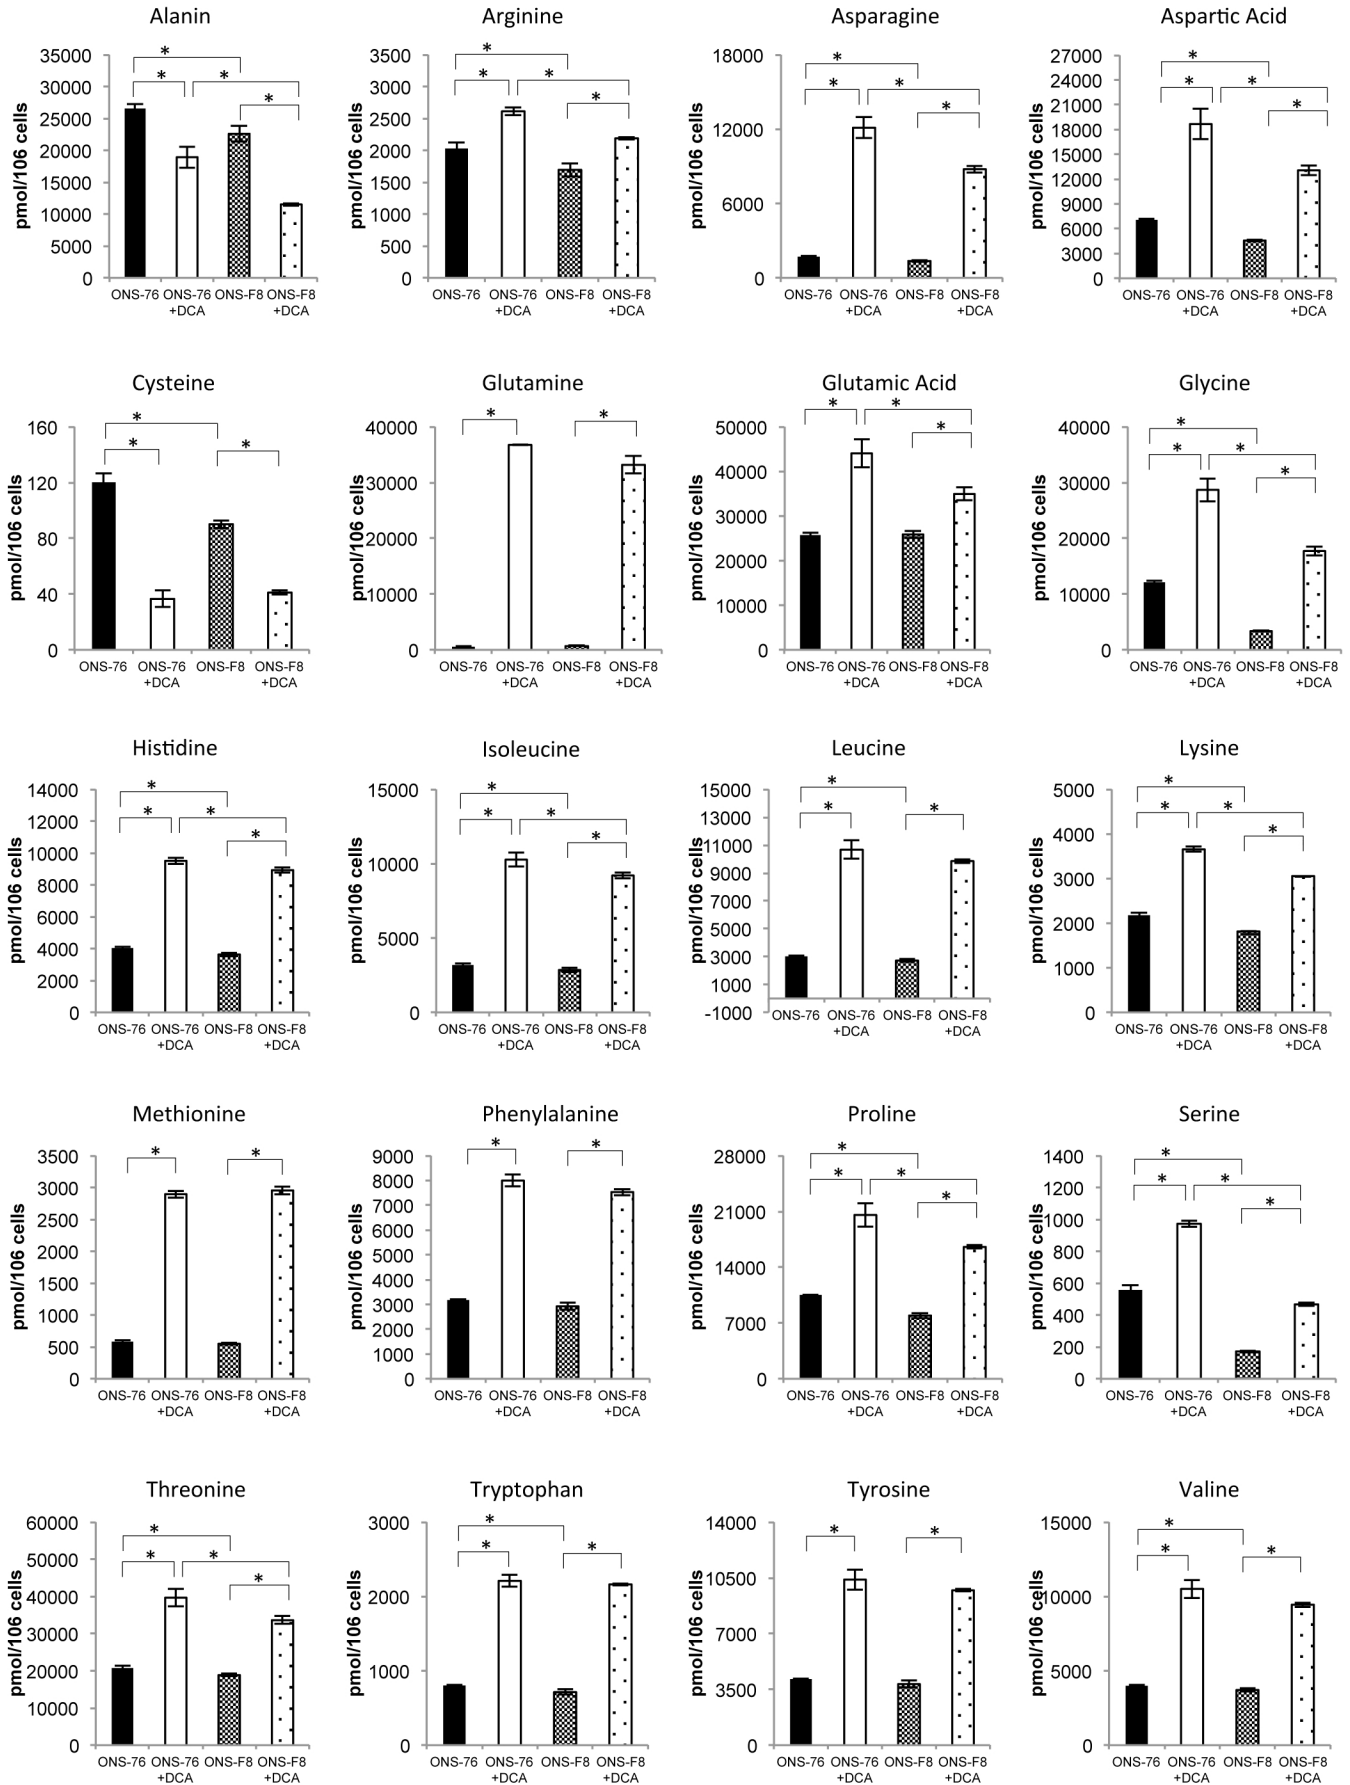

**S4 Fig. Metabolome analysis in ONS-76 and -F8 cells with and without DCA.** (A) Glycolysis, (B) TCA cycle, NADH, and NAD<sup>+</sup>, (C) ATP, ADP, and AMP, and (D) amino acids in ONS-76, -F8 and -B11 cells. All quantitative data are means  $\pm$  S.D. \*P<0.05, Welch's t-test.
