# Supplementary material for: Metabolic analysis of radioresistant medulloblastoma stem-like clones and potential therapeutic targets
Source: PubMed Central journal article supplement (PMC5398704; doi:10.1371/journal.pone.0176162), 2017-04-20
Supplement: pone.0176162.s005.pdf [file pone.0176162.s005.pdf]

## S5 Fig

|                                  | Concentration (pmol/10 <sup>6</sup> cells) |         |         |         |         |         | ONS-F8/<br>ONS-76 | P value<br>(Welch's<br>t test) |
|----------------------------------|--------------------------------------------|---------|---------|---------|---------|---------|-------------------|--------------------------------|
|                                  | ONS-76                                     |         |         | ONS-F8  |         |         |                   |                                |
|                                  | trial 1                                    | trial 2 | trial 3 | trial 1 | trial 2 | trial 3 |                   |                                |
| Phosphoenolpyruvic<br>acid (PEP) | 1.6                                        | 4.2     | 1.4     | 11.6    | 10.9    | 14.9    | 5.2               | 0.003                          |
| Pyruvic acid                     | 202                                        | 165     | 169     | N.D.    | N.D.    | 134     | 0.75              | N.A.                           |
| Intracellular lactic<br>acid     | 525                                        | 371     | 24      | 762     | 174     | 290     | 1.3               | 0.7                            |
| Acetyl CoA                       | 0.78                                       | 0.77    | 0.70    | N.D.    | N.D.    | 0.58    | 0.78              | N.A.                           |
| Citric acid                      | 2067                                       | 2017    | 1881    | 1819    | 1710    | 1681    | 0.87              | 0.03                           |

**S5 Fig. Concentration of phosphoenolpyruvic acid, pyruvic acid, intracellular lactic acid, acetyl CoA, and citric acid in ONS-76 and -F8 cells.** All quantitative data are means  $\pm$  S.D. \*P<0.05, Welch's t-test.
